# Supplementary material for: Rich redox-activity and solvatochromism in a family of heteroleptic cobalt complexes
Source: Royal Society of Chemistry journal article supplement (doi:10.1039/d1dt03327a), 2021-01-01
Supplement: d1dt03327a1.pdf [file d1dt03327a1.pdf]

*Supplementary information to accompany*

## **Rich Redox-Activity and Solvatochromism in a Family of Heteroleptic Cobalt Complexes**

Vincent L. Nadurata, Moya A. Hay, Jett T. Janetzki, Gemma K. Gransbury, and Colette Boskovic \*

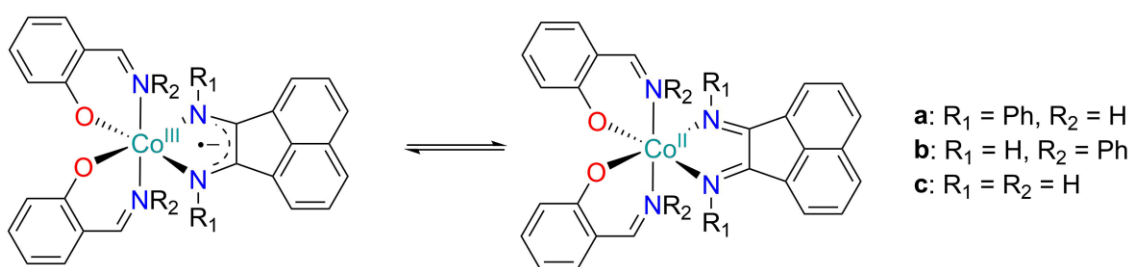

**Chart S1** Valence tautomeric equilibria of complexes computationally predicted to exhibit VT.<sup>1</sup>

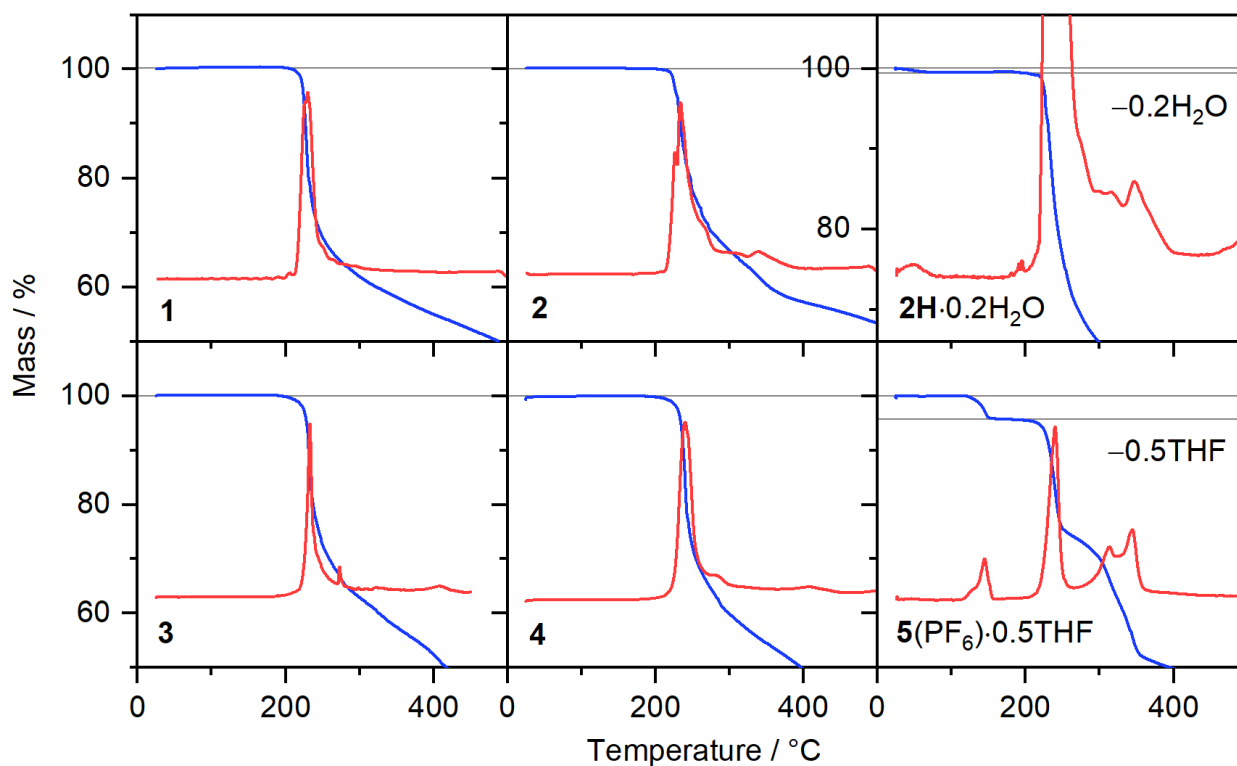

**Fig. S1** Thermogravimetric analysis of **1**, **2**, **2H**·0.2H<sub>2</sub>O, **3**, **4**, and **5**(PF<sub>6</sub>)·0.5THF. Mass loss profile in blue, and scaled negative of the first derivative in red.

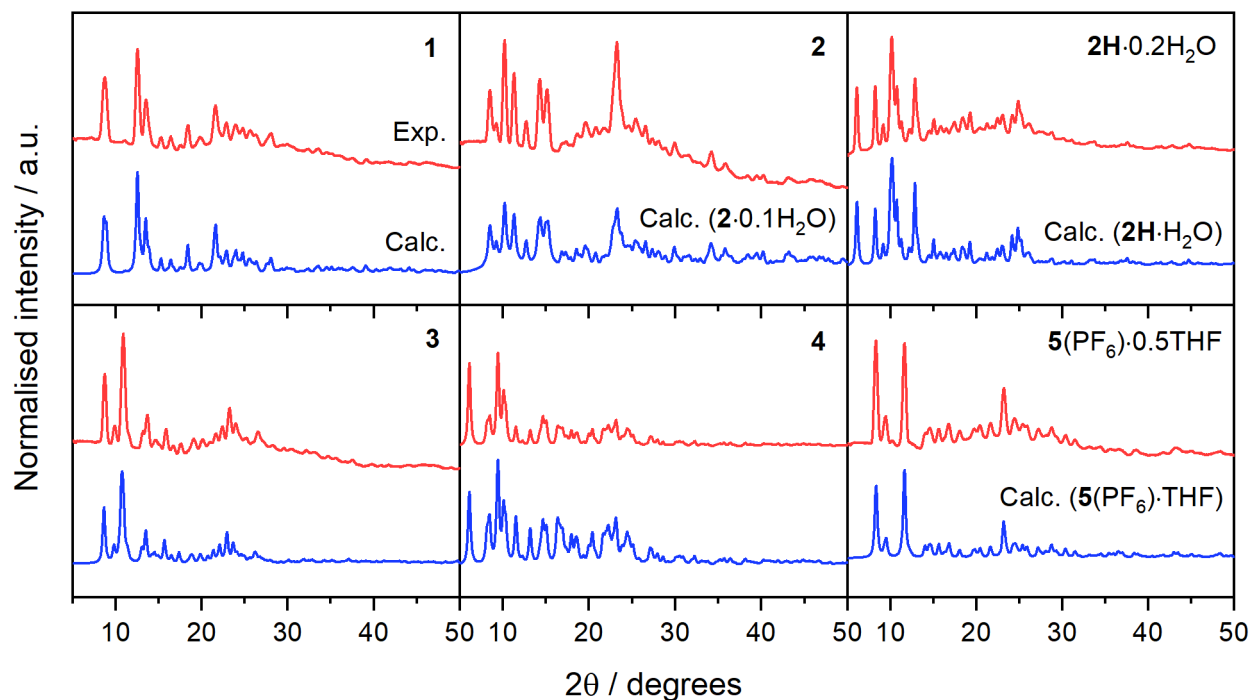

**Fig. S2** Calculated PXRD patterns of the crystal structures (blue) vs. experimental PXRD patterns of the bulk samples of **1**, **2**, **2H·0.2H<sub>2</sub>O**, **3**, **4**, and **5(PF<sub>6</sub>)·0.5THF** (red). All measurements collected at 100 K, except for **3** (300 K) and **5(PF<sub>6</sub>)·0.5THF** (175 K). For **2**, the theoretical pattern is calculated from the crystal structure of the freshly mounted crystal, **2·0.1H<sub>2</sub>O**. The agreement of the experimental pattern of **2** with the calculated pattern of **2·0.1H<sub>2</sub>O** indicates that the partial loss of solvent in the bulk sample is not accompanied by a loss in crystallinity. Likewise, for **2H·0.2H<sub>2</sub>O**, the theoretical pattern is calculated from the crystal structure of the freshly mounted crystal, **2H·H<sub>2</sub>O**. The agreement of the experimental pattern of **2·0.2H<sub>2</sub>O** with the calculated pattern of **2·H<sub>2</sub>O** indicates that the partial loss of solvent in the bulk sample is not accompanied by a loss in crystallinity. Finally, for **5(PF<sub>6</sub>)·0.5THF**, the theoretical pattern is calculated from the crystal structure of the freshly mounted crystal, **5(PF<sub>6</sub>)·THF**, with the agreement of the patterns again indicating that the bulk and crystal are of the same phase.

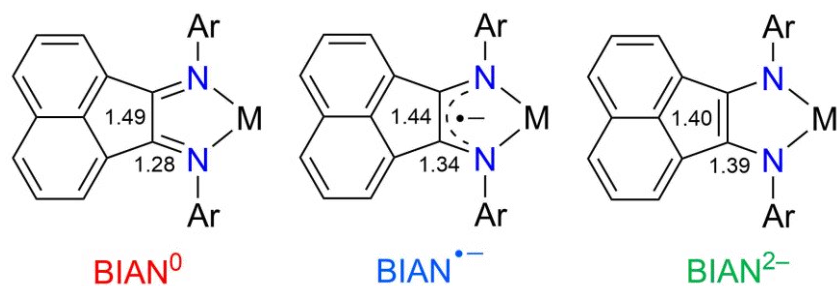

**Fig. S3** Neutral, monoanionic radical, and dianionic oxidation states of coordinated BIAN, with typical bond lengths of the C<sub>1</sub>-C<sub>2</sub> and imine C-N bonds displayed.<sup>2-4</sup>

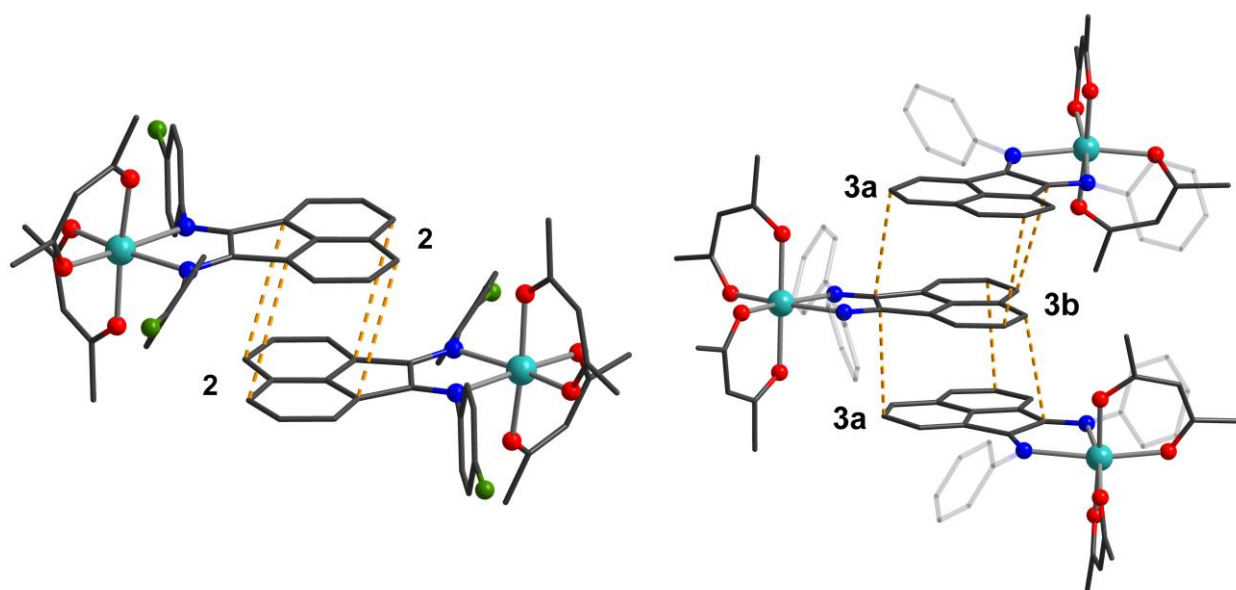

**Fig. S4**  $\pi$ - $\pi$  stacking interactions between acenaphthene moieties of molecules of **2** in 2·0.1H<sub>2</sub>O (left) and **3a** and **3b** in **3** (right). Hydrogen atoms omitted for clarity. Colour code: C (grey), N (blue), O (red), Co (aqua), Cl (dark green).

**Table S1** Plane-plane distance,  $d$ , between pairs of acenaphthene moieties in the structures of **1**, 2·0.1H<sub>2</sub>O, **4** and 5(PF<sub>6</sub>)·THF. Since  $d$  is undefined in the structure of **3**, an average point-plane distance is listed instead.

| <b>1</b> | 2·0.1H <sub>2</sub> O | <b>3</b> | <b>4</b> | 5(PF <sub>6</sub> )·THF |
|----------|-----------------------|----------|----------|-------------------------|
|----------|-----------------------|----------|----------|-------------------------|

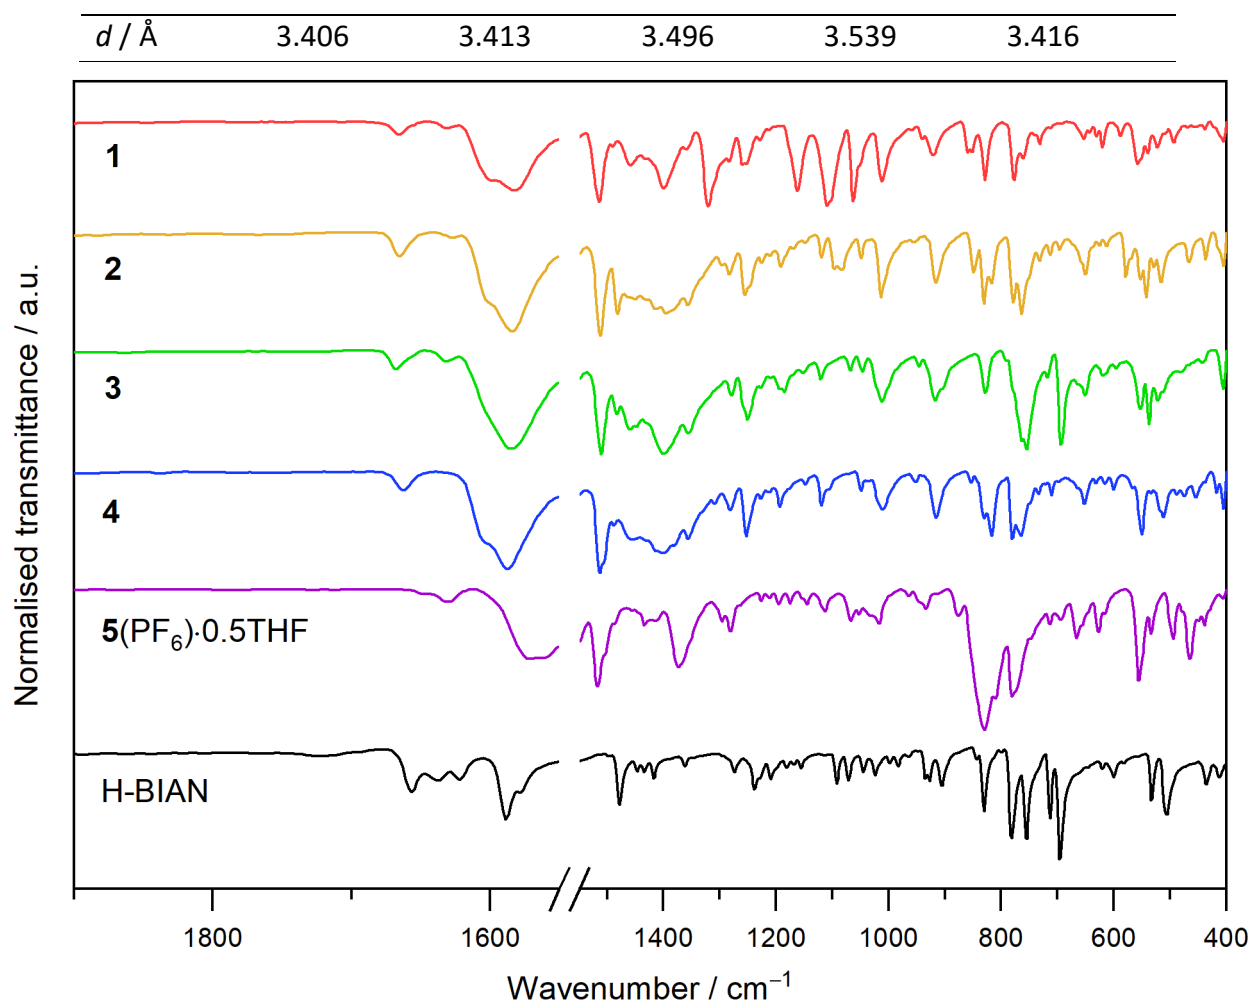

**Fig. S5** ATR-IR spectra of H-BIAN, **1–4**, and **5(PF<sub>6</sub>)·0.5THF**. The region above 1550 cm<sup>-1</sup> is at an increased scale to highlight the characteristic C=N signals in this vicinity.

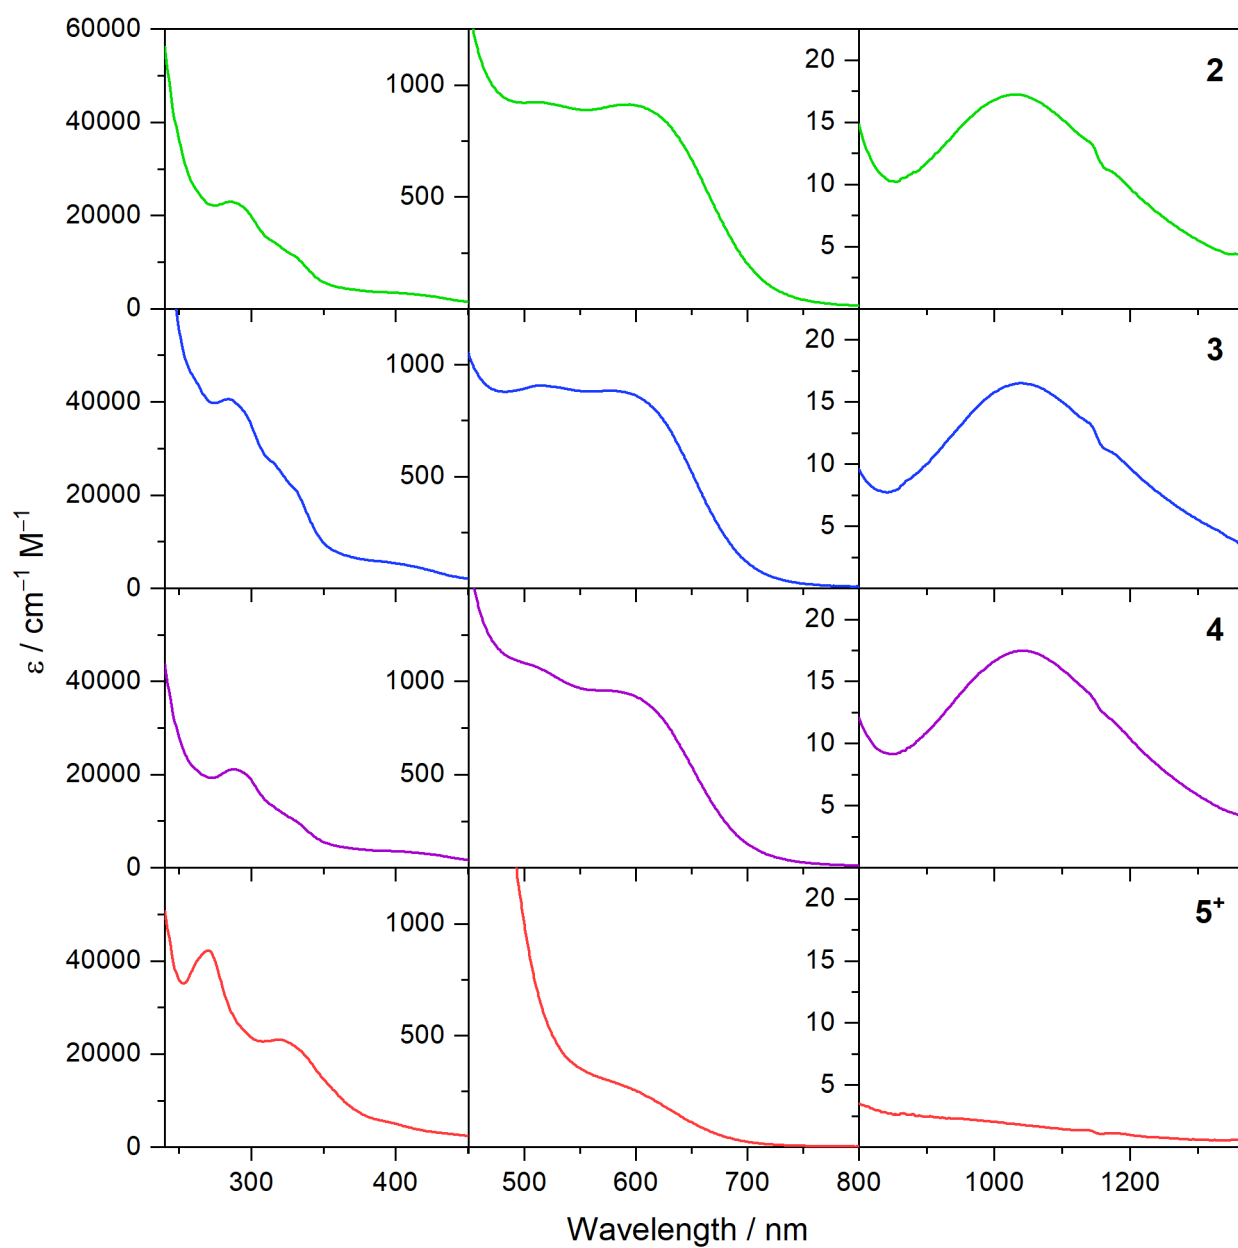

**Fig. S6** UV-vis-NIR absorbance spectra of **2–4** and **5<sup>+</sup>** in DCM. Equivalent plot for **1** presented in main text (Fig. 3).

**Table S2** Peak maximum of  ${}^4T_1(F) \rightarrow {}^4T_2$  transition of **1–4** in DCM solution.

|                                    | <b>1</b> | <b>2</b> | <b>3</b> | <b>4</b> |
|------------------------------------|----------|----------|----------|----------|
| $\lambda_{\text{max}} / \text{nm}$ | 1022     | 1032     | 1040     | 1042     |

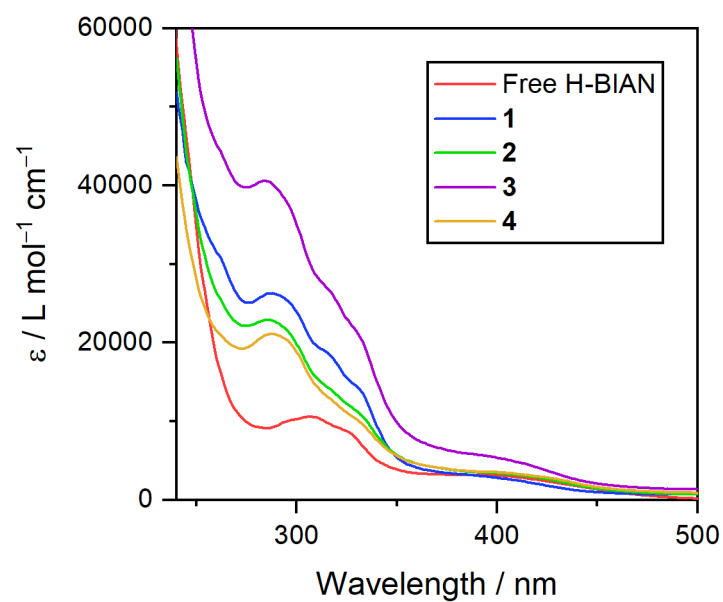

**Fig. S7** UV-vis absorbance spectra of **1–4** in DCM compared with that of free H-BIAN.

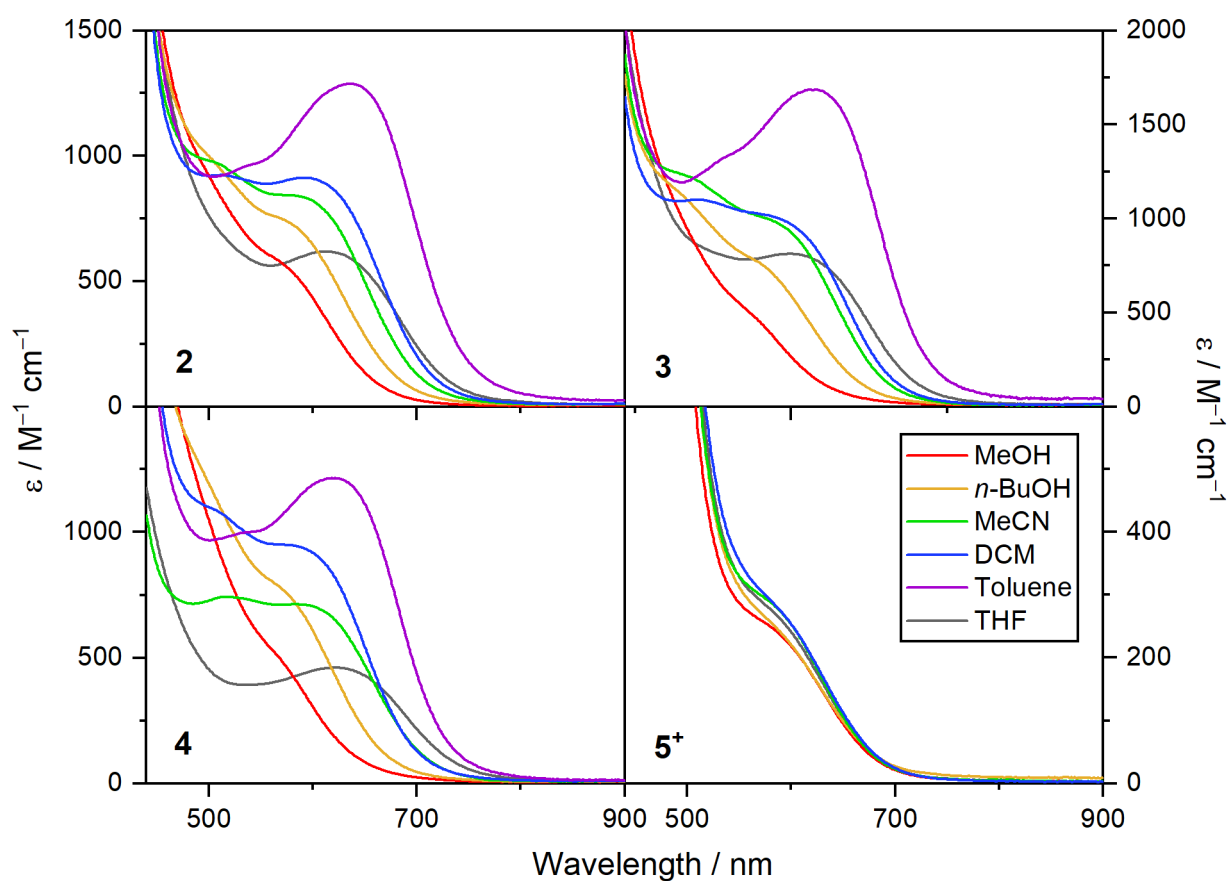

**Fig. S8** Visible region spectra of **2**, **3**, **4**, and **5<sup>+</sup>** in various solvents. Equivalent plot for **1** presented in main text (Fig. 5).

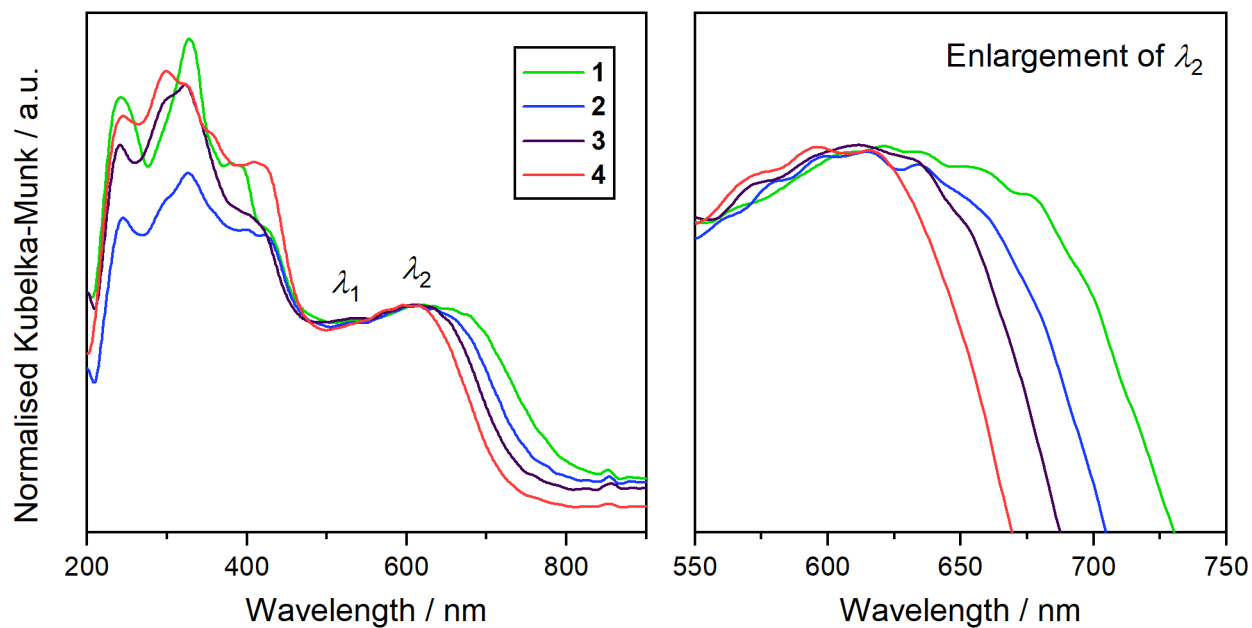

**Fig. S9** Diffuse reflectance spectra ( $\sim 1\%$  in KBr) of **1–4**, normalised to the  $\lambda_2$  transition. Right: diffuse reflectance spectra enlarged on the  $\lambda_2$  transition.

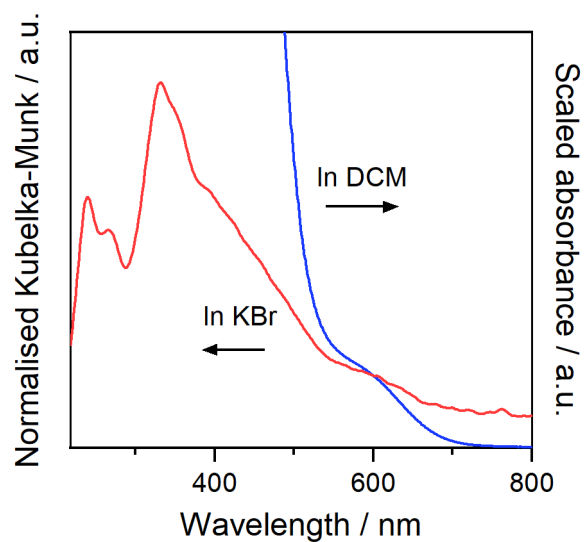

**Fig. S10** Comparison of the diffuse reflectance spectrum of **5**(PF<sub>6</sub>)·0.5THF ( $\sim 1\%$  in KBr) with the solution state spectrum in DCM.

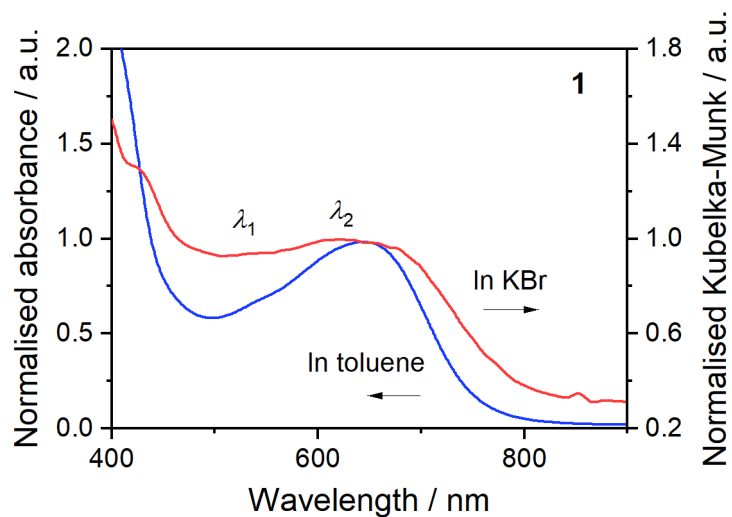

**Fig. S11** Comparison of the diffuse reflectance spectrum of **1** (~1% in KBr) with the solution state spectrum in toluene. Both spectra are normalised to the  $\lambda_2$  transition.

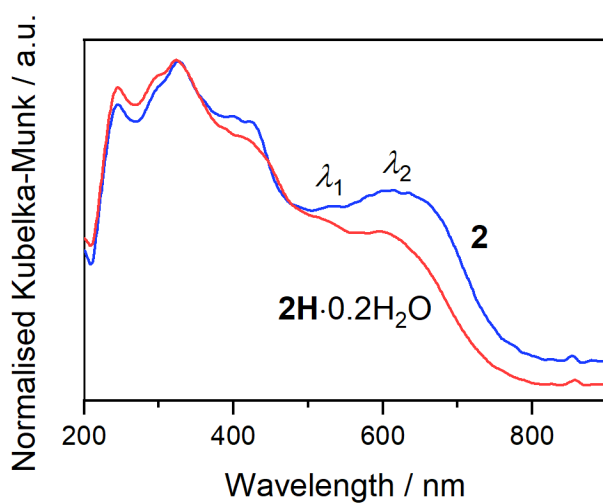

**Fig. S12** Diffuse reflectance UV-vis spectra of **2** and **2H·0.2H<sub>2</sub>O**, normalised to the highest absorbing peak.

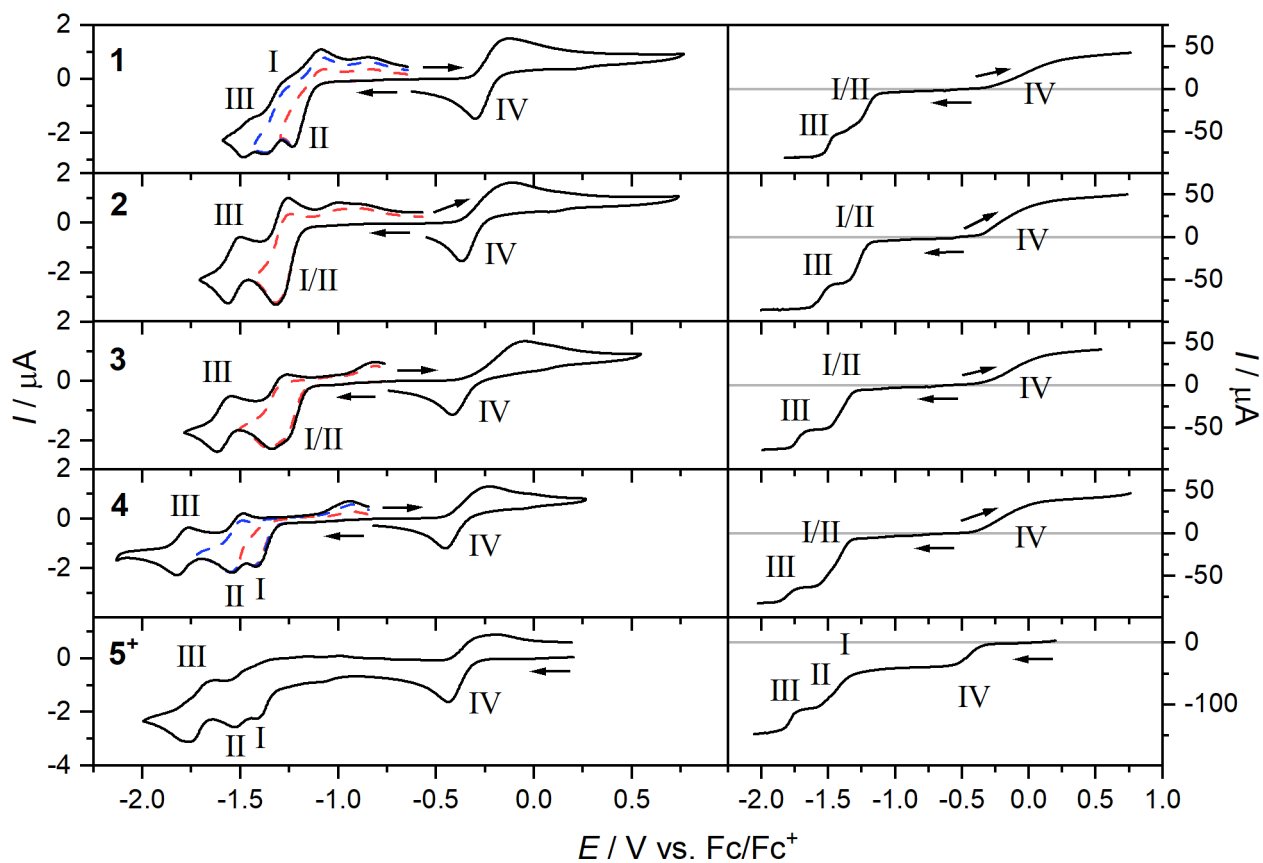

**Fig. S13** Cyclic voltammograms of **1–4** and **5<sup>+</sup>** in MeCN (1.0 mM with 0.25 M Bu<sub>4</sub>NPF<sub>6</sub>) at a scan rate of 100 mV s<sup>-1</sup>, and RDE voltammograms of **1–4** and **5<sup>+</sup>** (50 mV s<sup>-1</sup> scan rate, 500 rpm rotation rate).

**Table S3** Cyclic and RDE voltammetry data for compounds **1–4** and **5<sup>+</sup>** in MeCN (1 mM analyte with 0.25 M Bu<sub>4</sub>NPF<sub>6</sub>).

|                      | Cyclic voltammetry data in V ( $\Delta E$ in mV) |                                      |                                       |                      | RDE voltammetry $E_{1/2}$ in V ( $i_L$ in $\mu A$ ) |               |               |
|----------------------|--------------------------------------------------|--------------------------------------|---------------------------------------|----------------------|-----------------------------------------------------|---------------|---------------|
|                      | <i>I</i> , $E_{pc}$                              | <i>II</i> , $E_{1/2}$ ( $\Delta E$ ) | <i>III</i> , $E_{1/2}$ ( $\Delta E$ ) | <i>IV</i> , $E_{pa}$ | <i>I</i> / <i>II</i> <sup>a</sup>                   | <i>III</i>    | <i>IV</i>     |
| <b>1</b>             | −1.380                                           | −1.235 <sup>b</sup>                  | −1.480 <sup>b</sup>                   | −0.125               | −1.261 (46.3)                                       | −1.498 (27.3) | −0.035 (32.8) |
| <b>2</b>             | −1.320 <sup>a</sup>                              | —                                    | −1.533 (55)                           | −0.115               | −1.270 (46.7)                                       | −1.556 (31.5) | −0.186 (38.1) |
| <b>3</b>             | −1.363 <sup>a</sup>                              | —                                    | −1.601 (65)                           | −0.048               | −1.401 (46.0)                                       | −1.730 (22.4) | −0.124 (33.2) |
| <b>4</b>             | −1.413                                           | −1.511 (55)                          | −1.791 (55)                           | −0.228               | −1.442 (56.4)                                       | −1.799 (17.5) | −0.191 (41.8) |
| <b>5<sup>+</sup></b> | −1.418                                           | −1.528 <sup>b</sup>                  | −1.696 (145)                          | −0.438 <sup>c</sup>  | −1.429 (61.3)                                       | −1.785 (33.5) | −0.447 (36.3) |

<sup>a</sup>  $E_{pc}$  or  $E_{1/2}$  of the overlapped process combining *I* and *II*. <sup>b</sup>  $E_{pc}$  rather than  $E_{1/2}$ . <sup>c</sup>  $E_{pc}$  rather than  $E_{pa}$ .

**Table S4** Parameters for the linear fits of the solvatochromic shifts of  $\lambda_1$  and  $\lambda_2$  to Equation 1 (see main text).

| $\lambda_1$ | $c_1$ | $c_2$ | $c_3$ | $R^2$ |
|-------------|-------|-------|-------|-------|
| <b>1</b>    | 2.236 | 0.246 | 0.116 | 0.531 |
| <b>2</b>    | 2.234 | 0.373 | 0.062 | 0.987 |
| <b>3</b>    | 2.292 | 0.199 | 0.109 | 0.800 |
| <b>4</b>    | 2.291 | 0.153 | 0.106 | 0.421 |
| $\lambda_2$ | $c_1$ | $c_2$ | $c_3$ | $R^2$ |
| <b>1</b>    | 1.785 | 0.293 | 0.197 | 0.961 |
| <b>2</b>    | 1.773 | 0.358 | 0.204 | 0.986 |
| <b>3</b>    | 1.819 | 0.349 | 0.201 | 0.986 |
| <b>4</b>    | 1.877 | 0.098 | 0.195 | 0.905 |

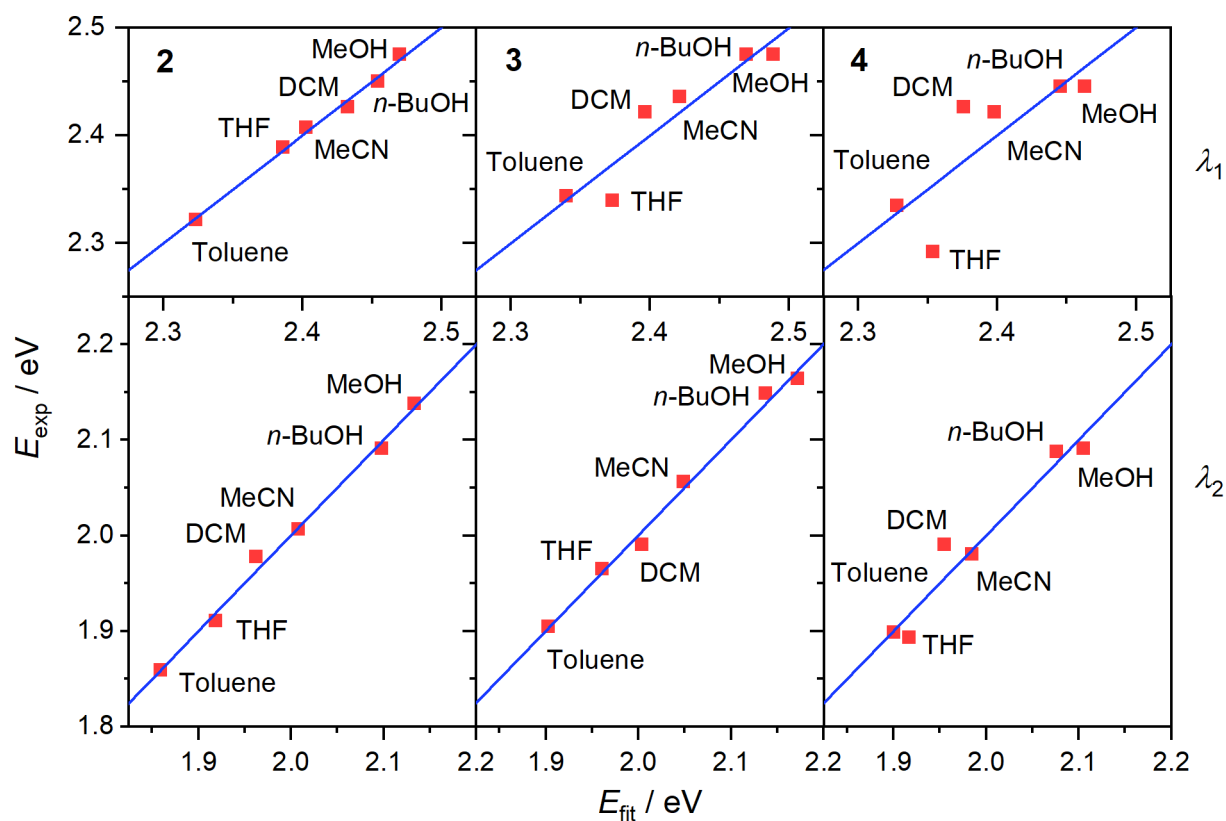

**Fig. S14** Experimental excitation energies of the lower energy (top) and higher energy (bottom) visible excitations of **2** (left), **3** (centre), and **4** (right), plotted against the model presented in Eqn. 1 (see text). Fitted parameters presented in Table S3.

## References

- 1 A. G. Starikov, A. A. Starikova and V. I. Minkin, *Russ. J. Gen. Chem.*, 2017, **87**, 98–106.
- 2 I. L. Fedushkin, A. A. Skatova, V. A. Chudakova and G. K. Fukin, *Angew. Chem., Int. Ed.*, 2003, **42**, 3294–3298.
- 3 I. L. Fedushkin, A. A. Skatova, V. A. Chudakova, V. K. Cherkasov, S. Dechert and H. Schumann, *Russ. Chem. Bull.*, 2004, **53**, 2142–2147.
- 4 J. O. Liimatta, B. Löfgren, M. Miettinen, M. Ahlgren, M. Haukka and T. T. Pakkanen, *J. Polym. Sci. Pol. Chem.*, 2001, **39**, 1426–1434.
